# Supplementary material for: Formation of cobalt–oxygen intermediates by dioxygen activation at a mononuclear nonheme cobalt(ii) center
Source: Royal Society of Chemistry journal article supplement (doi:10.1039/d1dt01996a), 2021-01-01
Supplement: d1dt01996a1.pdf [file d1dt01996a1.pdf]

## Electronic Supplementary Information

### Formation of cobalt-oxygen intermediates by dioxygen activation at a mononuclear nonheme cobalt(II) center

Deesha D. Malik,<sup>a</sup> Anirban Chandra,<sup>b</sup> Mi Sook Seo,<sup>a</sup> Yong-Min Lee,<sup>a</sup> Erik R. Farquhar,<sup>c</sup>  
Stefan Mebs,<sup>d</sup> Holger Dau,<sup>d</sup> Kallol Ray,<sup>\*,b</sup> and Wonwoo Nam<sup>\*,a</sup>

<sup>a</sup> *Department of Chemistry and Nano Science, Ewha Womans University, Seoul 03760, Korea*

<sup>b</sup> *Department of Chemistry, Humboldt-Universität zu Berlin, Brook-Taylor-Straße 2, 12489 Berlin, Germany*

<sup>c</sup> *Case Center for Synchrotron Biosciences, NSLS-II, Brookhaven National Laboratory Upton, NY 11973, USA*

<sup>d</sup> *Freie Universität Berlin, FB Physik, Arnimallee 14, 14195 Berlin, Germany*

<sup>\*</sup>To whom correspondence should be addressed.

E-mail: [wwnam@ewha.ac.kr](mailto:wwnam@ewha.ac.kr); [kallol.ray@chemie.hu-berlin.de](mailto:kallol.ray@chemie.hu-berlin.de)

## Table of Contents

|          |                                                                                                                       |     |
|----------|-----------------------------------------------------------------------------------------------------------------------|-----|
| Table S1 | Crystallographic data of <b>1</b> -BPh <sub>4</sub>                                                                   | S4  |
| Table S2 | Bond distance and bond angles of <b>1</b> -BPh <sub>4</sub>                                                           | S5  |
| Table S3 | Product analysis of cyclohexene- <i>h</i> <sub>10</sub> /cyclohexene- <i>d</i> <sub>10</sub>                          | S6  |
| Table S4 | EXAFS simulation results for <b>2a</b>                                                                                | S7  |
| Table S5 | EXAFS simulation results for <b>3</b>                                                                                 | S8  |
| Table S6 | DFT optimized parameters                                                                                              | S9  |
| Table S7 | Hammett parameters of <i>p</i> -X-PhCHO for <b>2a</b>                                                                 | S10 |
| Table S8 | <i>k</i> <sub>2</sub> values for HAT and OAT reactions by <b>2a</b> and <b>3</b>                                      | S11 |
| Table S9 | Product analysis for HAT and OAT reactions                                                                            | S12 |
| Fig. S1  | Crystal structure and EPR of <b>1</b> -BPh <sub>4</sub>                                                               | S13 |
| Fig. S2  | UV-vis spectra for generation of <b>2a</b>                                                                            | S14 |
| Fig. S3  | <i>k</i> <sub>2</sub> values with THF/THF- <i>d</i> <sub>8</sub>                                                      | S15 |
| Fig. S4  | UV-vis and <i>k</i> <sub>2</sub> values with cyclohexene- <i>h</i> <sub>10</sub> /cyclohexene- <i>d</i> <sub>10</sub> | S16 |
| Fig. S5  | EPR spectra for <b>2a</b> , <b>2b</b> and <b>2c</b>                                                                   | S17 |
| Fig. S6  | CSI-MS spectra of <b>2b</b>                                                                                           | S18 |
| Fig. S7  | UV-vis spectra for generation of <b>2c</b>                                                                            | S19 |
| Fig. S8  | CSI-MS spectra of <b>2c</b>                                                                                           | S20 |
| Fig. S9  | UV-vis spectra for formation of <b>3</b> from <b>2b</b> and <b>2c</b>                                                 | S21 |
| Fig. S10 | Fourier-transformed EXAFS spectra of <b>3</b>                                                                         | S22 |
| Fig. S11 | DFT optimized structures                                                                                              | S23 |
| Fig. S12 | Spin amount quantification of <b>3</b>                                                                                | S24 |
| Fig. S13 | Generation of <b>2a</b> in presence of DMPO                                                                           | S25 |
| Fig. S14 | UV-vis spectra of <b>1</b> with 2,6-DTBP and 9,10-DHA                                                                 | S26 |
| Fig. S15 | UV-vis spectra of <b>3</b> with CCA                                                                                   | S27 |
| Fig. S16 | Reactivity study of <b>2a</b> with CCA                                                                                | S28 |
| Fig. S17 | Product analysis of <b>2a</b> with CCA                                                                                | S29 |
| Fig. S18 | Aldehyde deformylation reactions of <i>p</i> -X-PhCHO by <b>2a</b>                                                    | S30 |
| Fig. S19 | Reactivity study of <b>2a</b> with PPh <sub>3</sub>                                                                   | S31 |

|          |                                                        |     |
|----------|--------------------------------------------------------|-----|
| Fig. S20 | Product analysis of <b>2a</b> with PPh <sub>3</sub>    | S32 |
| Fig. S21 | Reactivity study of <b>3</b> with PPh <sub>3</sub>     | S33 |
| Fig. S22 | Product analysis of <b>3</b> with PPh <sub>3</sub>     | S34 |
| Fig. S23 | C-H bond activation reaction by <b>2a</b>              | S35 |
| Fig. S24 | C-H bond activation reaction by <b>3</b>               | S36 |
| Fig. S25 | Reactivity study of <b>2c</b> in HAT and OAT reactions | S37 |
| Fig. S26 | Product analysis of <b>2a</b> with xanthene            | S38 |
| Fig. S27 | Product analysis of <b>3</b> with xanthene             | S39 |

**Table S1.** Crystallographic data and refinements for **1-BPh<sub>4</sub>**.

|                                                                               | <b>1-BPh<sub>4</sub></b>                                                         |
|-------------------------------------------------------------------------------|----------------------------------------------------------------------------------|
| Empirical formula                                                             | C <sub>45</sub> H <sub>68</sub> Co N <sub>10</sub> B                             |
| Formula weight                                                                | 758.74                                                                           |
| Temperature (K)                                                               | 296.15                                                                           |
| Wavelength (Å)                                                                | 0.71073                                                                          |
| Crystal system/space group                                                    | Monoclinic, <i>P2(1)/n</i>                                                       |
| Unit cell dimensions                                                          |                                                                                  |
| <i>a</i> (Å)                                                                  | 17.8648(18)                                                                      |
| <i>b</i> (Å)                                                                  | 19.110(2)                                                                        |
| <i>c</i> (Å)                                                                  | 18.2001(19)                                                                      |
| $\alpha$ (°)                                                                  | 90                                                                               |
| $\beta$ (°)                                                                   | 91.7957(13)                                                                      |
| $\gamma$ (°)                                                                  | 90                                                                               |
| Volume (Å <sup>3</sup> )                                                      | 6210.2(11)                                                                       |
| <i>Z</i>                                                                      | 6                                                                                |
| Calculated density (g/cm <sup>3</sup> )                                       | 1.2172                                                                           |
| Absorption coefficient (mm <sup>-1</sup> )                                    | 0.326                                                                            |
| <i>F</i> (100)                                                                | 2438.1511                                                                        |
| Reflections collected                                                         | 11020                                                                            |
| Absorption correction                                                         | multi-scan ( <i>T</i> <sub>min</sub> = 0.7073, <i>T</i> <sub>max</sub> = 0.7452) |
| Independent reflections [ <i>R</i> (int)]                                     | 9194                                                                             |
| Data/restraints/parameters                                                    | 11020/0/750                                                                      |
| Goodness-of-fit on <i>F</i> <sup>2</sup>                                      | 1.0451                                                                           |
| Final <i>R</i> indices [ <i>F</i> <sup>2</sup> > 2σ( <i>F</i> <sup>2</sup> )] | <i>R</i> <sub>1</sub> = 0.0307, <i>wR</i> <sub>2</sub> = 0.0702                  |
| <i>R</i> indices (all data)                                                   | <i>R</i> <sub>1</sub> = 0.0416, <i>wR</i> <sub>2</sub> = 0.0755                  |
| Largest difference peak and hole (e/Å <sup>3</sup> )                          | 0.252 and −0.345                                                                 |

**Table S2.** Selected bond distances (Å) and angles (°) for **1**-BPh<sub>4</sub>.

| Bond Distances (Å) |  |            |
|--------------------|--|------------|
| Co1-N1             |  | 1.9850(13) |
| Co1-N5             |  | 1.9787(13) |
| Co1-N8             |  | 1.9921(13) |
| Co1-N4             |  | 2.0735(12) |
| Bond Angles (°)    |  |            |
| N5-Co1-N1          |  | 122.55(5)  |
| N8-Co1-N1          |  | 117.66(5)  |
| N8-Co1-N5          |  | 118.21(5)  |
| N4-Co1-N1          |  | 84.84(5)   |
| N4-Co1-N5          |  | 85.97(5)   |
| N4-Co1-N8          |  | 86.68(5)   |

**Table S3.** Product analysis for the O<sub>2</sub>-activation reactions by **1** with cyclohexene-*h*<sub>10</sub> and cyclohexene-*d*<sub>10</sub> in O<sub>2</sub>-saturated acetone at 25 °C.

| substrate                           | product           | yield, % |
|-------------------------------------|-------------------|----------|
| cyclohexene- <i>h</i> <sub>10</sub> | cyclohex-2-enol   | 16       |
|                                     | cyclohex-2-enone  | 20       |
|                                     | cyclohexene oxide | 2        |
| cyclohexene- <i>d</i> <sub>10</sub> | cyclohex-2-enol   | 17       |
|                                     | cyclohex-2-enone  | 2        |
|                                     | cyclohexene oxide | 19       |

**Table S4.** Results of the EXAFS simulations (fit)<sup>a</sup> for **2a**.

| fit       | Co-N/O   |             |            | Co-O/N |      |            | Co•••C   |             |            | $\Delta E_0$ | $\chi^2$    | R             |
|-----------|----------|-------------|------------|--------|------|------------|----------|-------------|------------|--------------|-------------|---------------|
|           | n        | r           | $\sigma^2$ | n      | r    | $\sigma^2$ | n        | r           | $\sigma^2$ |              |             |               |
| 1         | 4        | 2.04        | 6.9        |        |      |            |          |             |            | -0.78        | 14.09       | 0.0173        |
| 2         | 5        | 2.03        | 8.9        |        |      |            |          |             |            | -1.35        | 7.81        | 0.0096        |
| 3         | 6        | 2.03        | 10.9       |        |      |            |          |             |            | -1.88        | 15.72       | 0.0193        |
| 4         | 4        | 2.04        | 6.6        | 1      | 1.89 | 11.4       |          |             |            | -2.94        | 15.94       | 0.0048        |
| 5         | 3        | 2.06        | 5.6        | 1      | 1.94 | 5.3        |          |             |            | -0.91        | 34.56       | 0.0105        |
| 6         | 5        | 2.03        | 7.5        | 1      | 1.83 | 11.1       |          |             |            | -4.32        | 10.78       | 0.0033        |
| 7         | 5        | 2.04        | 8.9        |        |      |            |          |             |            | -1.49        | 48.78       | 0.1967        |
| 8         | 5        | 2.04        | 9.0        |        |      |            | 4        | 2.97        | 6.8        | -0.46        | 39.01       | 0.1301        |
| 9         | 5        | 2.04        | 9.0        |        |      |            | 6        | 2.97        | 10.0       | -0.50        | 42.58       | 0.1420        |
| 10        | 5        | 2.03        | 9.1        |        |      |            | 8        | 2.97        | 13.6       | -0.71        | 48.63       | 0.1622        |
| <b>11</b> | <b>5</b> | <b>2.04</b> | <b>9.0</b> |        |      |            | <b>4</b> | <b>2.97</b> | <b>6.7</b> | <b>-0.80</b> | <b>9.65</b> | <b>0.0255</b> |
|           |          |             |            |        |      |            | <b>4</b> | <b>3.40</b> | <b>2.8</b> |              |             |               |

<sup>a</sup> Fitting range was  $k = 2.0\text{--}12.4 \text{ \AA}^{-1}$  (resolution =  $0.145 \text{ \AA}$ ) with back transform ranges of  $1\text{--}1.9 \text{ \AA}$  for fits 1-6 and  $1\text{--}3.25 \text{ \AA}$  for fits 7-11. r is in units of  $\text{\AA}$ ;  $\sigma^2$  is in units of  $10^{-3} \text{ \AA}$ ;  $\Delta E_0$  is in units of eV; R represents the fractional mis-fit of the data, while  $\chi^2$  is the  $\chi^2$  fitting metric normalized by the number of independent data points in a given fit.

**Table S5.** Results of the EXAFS simulations (fit) for **3** (Rf = 9.9%).

| shell | N* | R    | err  | S*    | err   |
|-------|----|------|------|-------|-------|
| Co-O  | 1  | 1.85 | 0.04 | 0.075 | 0.008 |
| Co-N  | 4  | 2.03 | 0.02 | 0.075 |       |
| Co-C  | 4  | 2.86 | 0.03 | 0.075 |       |
| Co-C  | 3  | 3.06 | 0.05 | 0.075 |       |
| Co-C  | 8  | 3.40 | 0.02 | 0.075 |       |

**Table S6.** Selected bond distances in DFT-optimized structures of  $[(\text{TMG}_3\text{tren})\text{Co}^{\text{IV}}(\text{O})]^{2+}$ ,  $[(\text{TMG}_3\text{tren})\text{Co}^{\text{IV}}(\text{O})(\text{Sc}(\text{OTf})_3)]^{2+}$  and  $[(\text{TMG}_3\text{tren})\text{Co}^{\text{IV}}(\text{O})-(\text{Sc}(\text{OTf})(\text{OH})_2)_2]^{2+}$  in the  $S = 3/2$  state.

| model                                                                                                   | Co-N3 | Co-N4 | Co-N5 | Co-N6 | Co-O  | O-Sc1 | O-Sc2 | Co-Sc1 | Co-Sc2 |
|---------------------------------------------------------------------------------------------------------|-------|-------|-------|-------|-------|-------|-------|--------|--------|
| $[(\text{TMG}_3\text{tren})\text{Co}^{\text{IV}}(\text{O})]^{2+}$                                       | 2.071 | 1.978 | 1.967 | 2.018 | 1.636 | -     | -     | -      | -      |
| $[(\text{TMG}_3\text{tren})\text{Co}^{\text{IV}}(\text{O})(\text{Sc}(\text{OTf})_3)]^{2+}$              | 2.075 | 1.970 | 1.964 | 1.972 | 1.739 | 1.880 | -     | 3.619  | -      |
| $[(\text{TMG}_3\text{tren})\text{Co}^{\text{IV}}(\text{O})(\text{Sc}(\text{OTf})(\text{OH})_2)_2]^{2+}$ | 2.111 | 1.953 | 1.930 | 2.597 | 1.843 | 2.059 | 2.094 | 3.476  | 3.651  |

**Table S7.** Hammett parameters ( $\sigma_p^+$ ) of *p*-X-substituted benzaldehydes and second-order rate constants ( $k_2$ ) for the oxidation of *p*-X-substituted benzaldehydes by **2a** in acetone at 25 °C.

| substrate          | $\sigma_p^+$ <sup>a</sup> | $k_2$ , M <sup>-1</sup> s <sup>-1</sup> | log $k_2$ |
|--------------------|---------------------------|-----------------------------------------|-----------|
| <i>p</i> -Me-PhCHO | -0.311                    | $3.0(3) \times 10^{-1}$                 | -0.52     |
| <i>p</i> -F-PhCHO  | -0.073                    | $6.8(5) \times 10^{-1}$                 | -0.17     |
| PhCHO              | 0                         | $7.4(5) \times 10^{-1}$                 | -0.13     |
| <i>p</i> -CN-PhCHO | 0.659                     | 4.1(4)                                  | 0.61      |

<sup>a</sup> Taken from the reference: Brown H. C.; Okamoto, Y. Electrophilic Substituent Constants. *J. Am. Chem. Soc.*, **1958**, 80, 4979- 4987.

**Table S8.** Second-order rate constants for the hydrogen atom transfer and oxygen atom transfer reactions by **2a** at 25 °C and **3** at 0 °C in acetone.

| substrate                       | BDE, <sup>a</sup> kcal mol <sup>-1</sup> | $k_2$ , M <sup>-1</sup> s <sup>-1</sup> |                         |
|---------------------------------|------------------------------------------|-----------------------------------------|-------------------------|
|                                 |                                          | <b>2a</b>                               | <b>3</b>                |
| xanthene- <i>h</i> <sub>2</sub> | 75.5                                     | $3.9(3) \times 10^{-1}$                 | $7.0(6) \times 10^{-1}$ |
| xanthene- <i>d</i> <sub>2</sub> | -                                        | $8.4(6) \times 10^{-2}$                 | $3.1(3) \times 10^{-1}$ |
| DHA                             | 77                                       | $1.0(1) \times 10^{-1}$                 | $2.9(2) \times 10^{-1}$ |
| CHD                             | 78                                       | $6.8(5) \times 10^{-2}$                 | $7.5(6) \times 10^{-2}$ |
| PPh <sub>3</sub>                | -                                        | $8.4(5) \times 10^{-2}$                 | 7.3(5)                  |

<sup>a</sup> Taken from the reference 47 in Text.

**Table S9.** Product analysis for the hydrogen atom transfer and oxygen atom transfer reactions by **2a** at 25 °C and **3** at 0 °C in acetone.

| substrate        | product             | yield, %  |          |
|------------------|---------------------|-----------|----------|
|                  |                     | <b>2a</b> | <b>3</b> |
| xanthene         | xanthone            | 40(3)     | 100(4)   |
| DHA              | anthracene          | 100(4)    | 60(4)    |
| CHD              | benzene             | 88(4)     | 40(3)    |
| PPh <sub>3</sub> | Ph <sub>3</sub> P=O | 100(4)    | 80(4)    |

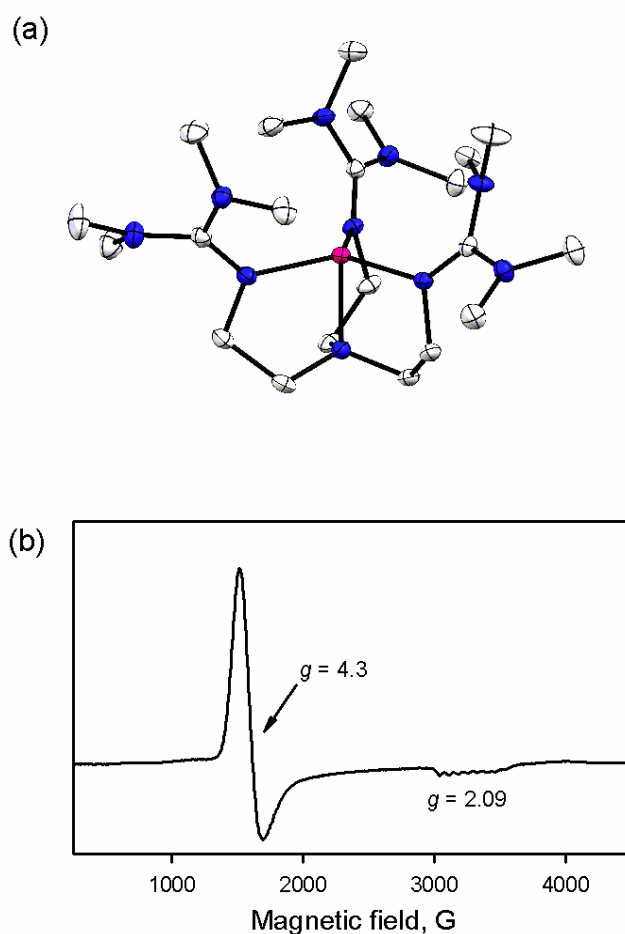

**Fig. S1** (a) X-ray single crystal structure of  $[(\text{TMG}_3\text{tren})\text{Co}^{\text{II}}]^{2+}$  moiety in  $[(\text{TMG}_3\text{tren})\text{Co}^{\text{II}}](\text{BPh}_4)_2$  (**1-BPh<sub>4</sub>**). Tetraphenyl borate anions and hydrogen atoms are omitted for clarity [Co, pink; N, blue; C, white] (see Tables S1 and S2 for the crystallographic data). (b) X-band CW-EPR spectrum of **1-BPh<sub>4</sub>** in acetone at 5 K.

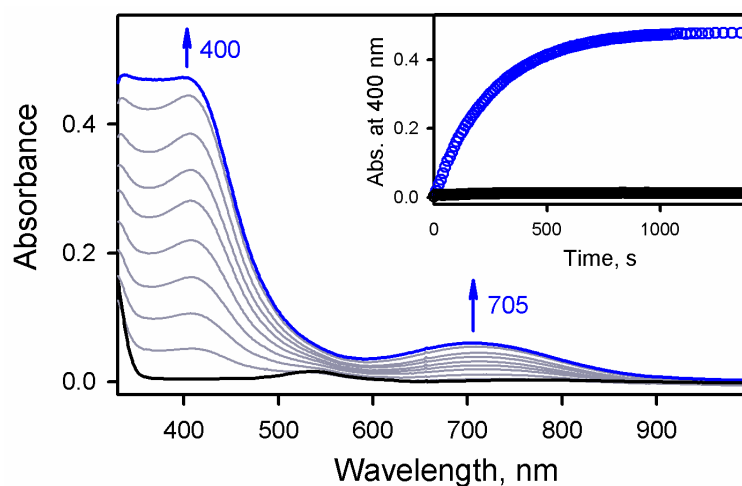

**Fig. S2** UV-vis spectral changes for the formation of **2a** (blue line) in the O<sub>2</sub>-activation reaction by **1** with THF upon addition of THF (0.20 M) to an O<sub>2</sub>-saturated acetone solution of **1** (0.25 mM; black line) at 25 °C. Inset shows time courses monitored at 400 nm under O<sub>2</sub> (blue circle) and Ar (black circle) atmospheres in acetone at 25 °C.

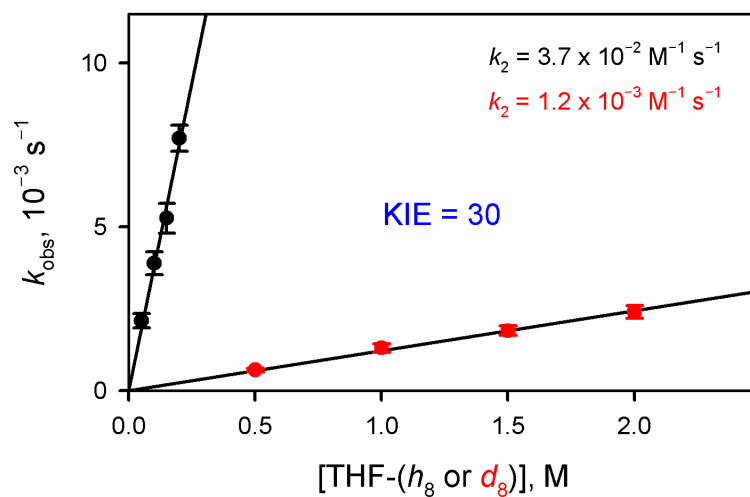

**Fig. S3** Plots of pseudo-first-order rate constants ( $k_{\text{obs}}$ ) against the concentration of THF (black circles) and THF- $d_8$  (red circles) for the formation of **2a** in the  $\text{O}_2$ -activation reaction by **1** in acetone at 25 °C to determine the second order rate constants ( $k_2$ ) and KIE value.

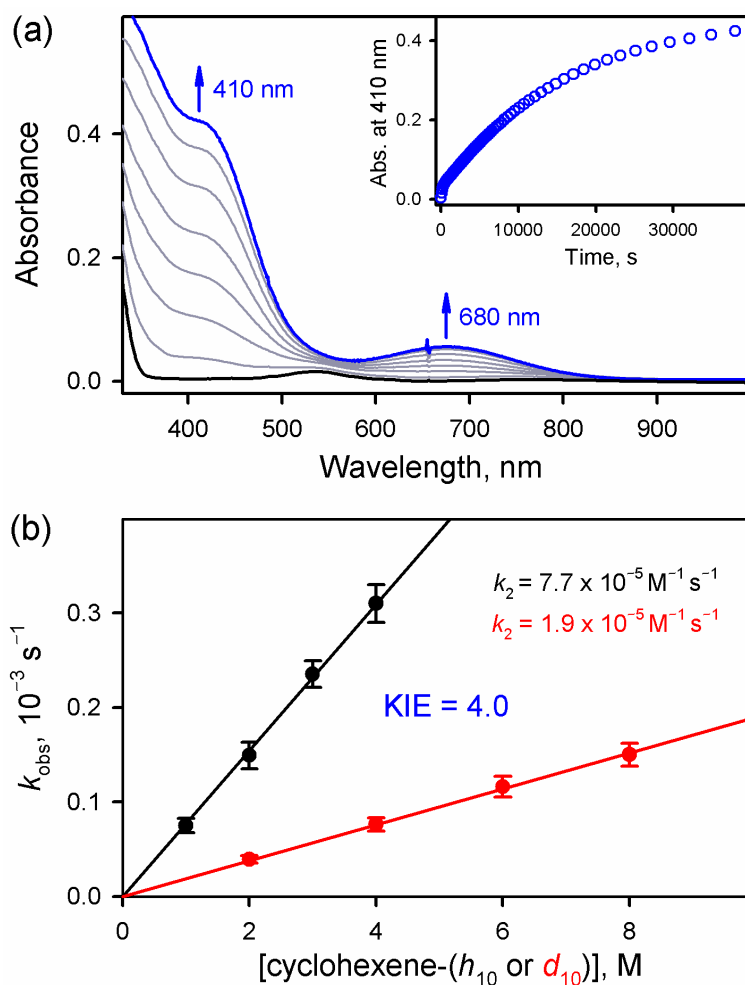

**Fig. S4** (a) UV-vis spectral changes for the formation of **2b** (blue line) in the O<sub>2</sub>-activation reaction by **1** upon addition of cyclohexene (1.0 M) to an O<sub>2</sub>-saturated acetone solution of **1** (0.25 mM; black line) at 25 °C. Inset shows time course monitored at 410 nm due to **2b**. (b) Plots of pseudo-first-order rate constants ( $k_{\text{obs}}$ ) against the concentration of cyclohexene (black circles) and cyclohexene- $d_{10}$  (red circles) for the formation of **2b** in the O<sub>2</sub>-activation reaction by **1** with cyclohexene-( $h_{10}$  or  $d_{10}$ ) in acetone at 25 °C to determine the second order rate constants ( $k_2$ ) and KIE value.

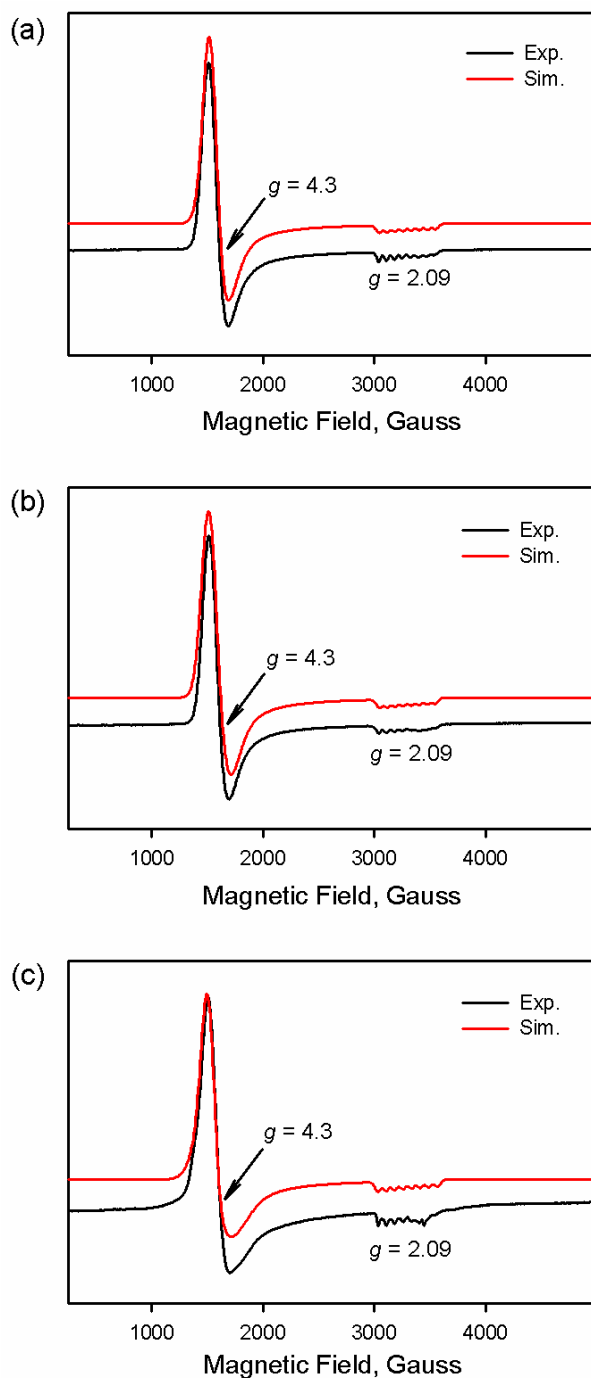

**Fig. S5** X-band CW-EPR spectra (black lines) of (a) **2a** (1.0 mM), (b) **2b** (1.0 mM), and (c) **2c** (1.0 mM). Spectra were recorded in acetone at 5 K. Red lines show the simulated spectra. Simulation parameters:  $g = [2.09, 4.35, 4.45]$  and  $A = [213, 154, 84]$  G for **2a**,  $g = [2.09, 4.28, 4.51]$  and  $A = [210, 148, 84]$  G for **2b**, and  $g = [2.09, 4.29, 4.51]$  and  $A = [213, 154, 84]$  G for **2c**.

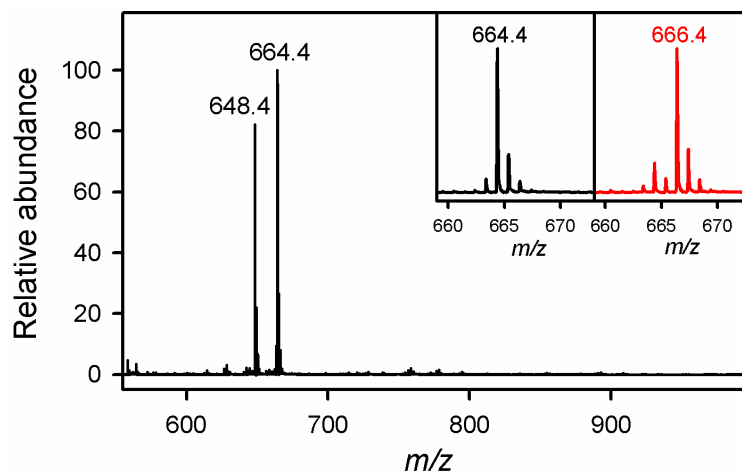

**Fig. S6** Positive mode CSI-MS spectrum of **2b** produced in the O<sub>2</sub>-activation reaction by **1** upon addition of cyclohexene (0.20 M) into an O<sub>2</sub>-saturated acetone solution of **1** (0.25 mM) at 25 °C. The peaks at  $m/z = 664.4$  and  $648.4$  correspond to  $[\text{Co}^{\text{IV}}(\text{O})(\text{TMG}_3\text{tren})(\text{OTf})]^+$  (calculated  $m/z = 664.3$ ) and  $[\text{Co}^{\text{II}}(\text{TMG}_3\text{tren})(\text{OTf})]^+$  (calculated  $m/z = 648.3$ ), respectively. The insets show the observed isotope distribution patterns for  $[\text{Co}^{\text{IV}}(^{16}\text{O})(\text{TMG}_3\text{tren})(\text{OTf})]^+$  ( $m/z = 664.4$ ) originated from **2b**-<sup>16</sup>O (left panel) and  $[\text{Co}^{\text{IV}}(^{18}\text{O})(\text{TMG}_3\text{tren})(\text{OTf})]^+$  ( $m/z = 666.4$ ) originated from **2b**-<sup>18</sup>O (right panel).

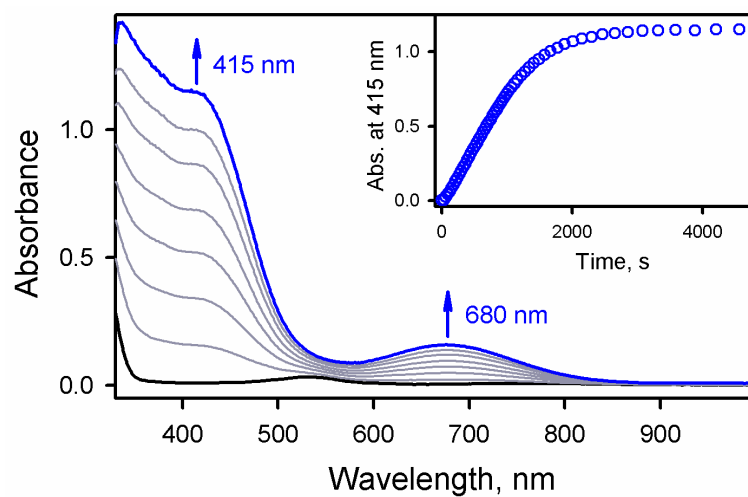

**Fig. S7** UV–vis spectral changes for the formation of **2c** (blue line) observed in the reaction of **1** (0.25 mM; black line) and cumene hydroperoxide (CumOOH; 50 mM) in acetone at 25 °C. Inset shows time course monitored at 415 nm due to **2c**.

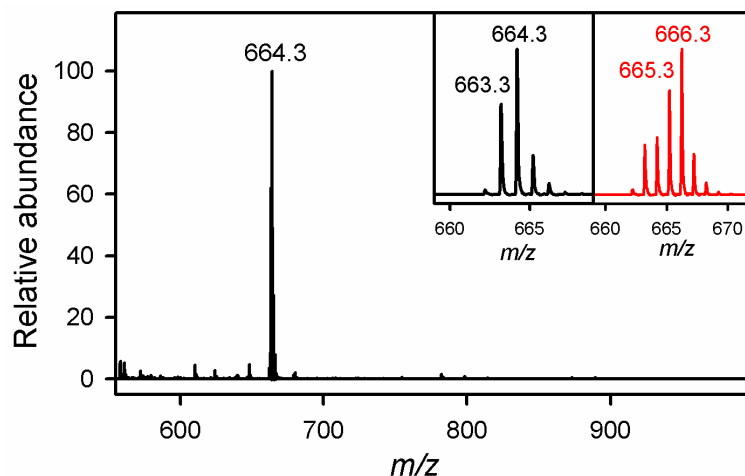

**Fig. S8** Positive mode CSI-MS spectrum of **2c** produced in the reaction of **1** (0.25 mM) and cumene hydroperoxide (CumOOH; 50 mM) in acetone at 25 °C. The peaks at  $m/z = 663.3$  and  $664.3$  correspond to  $[\text{Co}^{\text{III}}(\text{TMG}_3\text{tren-O})(\text{OTf})]^+$  (calculated  $m/z = 663.3$ ) and  $[\text{Co}^{\text{IV}}(\text{O})(\text{TMG}_3\text{tren})(\text{OTf})]^+$  (calculated  $m/z = 664.3$ ), respectively. The insets show the observed isotope distribution patterns for  $[\text{Co}^{\text{III}}(\text{TMG}_3\text{tren-}^{16}\text{O})(\text{OTf})]^+$  ( $m/z = 663.3$ ) and  $[\text{Co}^{\text{IV}}(^{16}\text{O})(\text{TMG}_3\text{tren})(\text{OTf})]^+$  ( $m/z = 664.3$ ) originated from **2c**- $^{16}\text{O}$  (left panel) and  $[\text{Co}^{\text{III}}(\text{TMG}_3\text{tren-}^{18}\text{O})(\text{OTf})]^+$  ( $m/z = 665.3$ ) and  $[\text{Co}^{\text{IV}}(^{18}\text{O})(\text{TMG}_3\text{tren})(\text{OTf})]^+$  ( $m/z = 666.4$ ) originated from **2c**- $^{18}\text{O}$  (right panel), indicating that, when Cum $^{18}\text{O}^{18}\text{OH}$  was used instead of Cum $^{16}\text{O}^{16}\text{OH}$ , two mass unit shift from  $m/z = 663.3$  and  $664.3$  to  $m/z = 665.3$  and  $666.3$ , respectively, was observed.

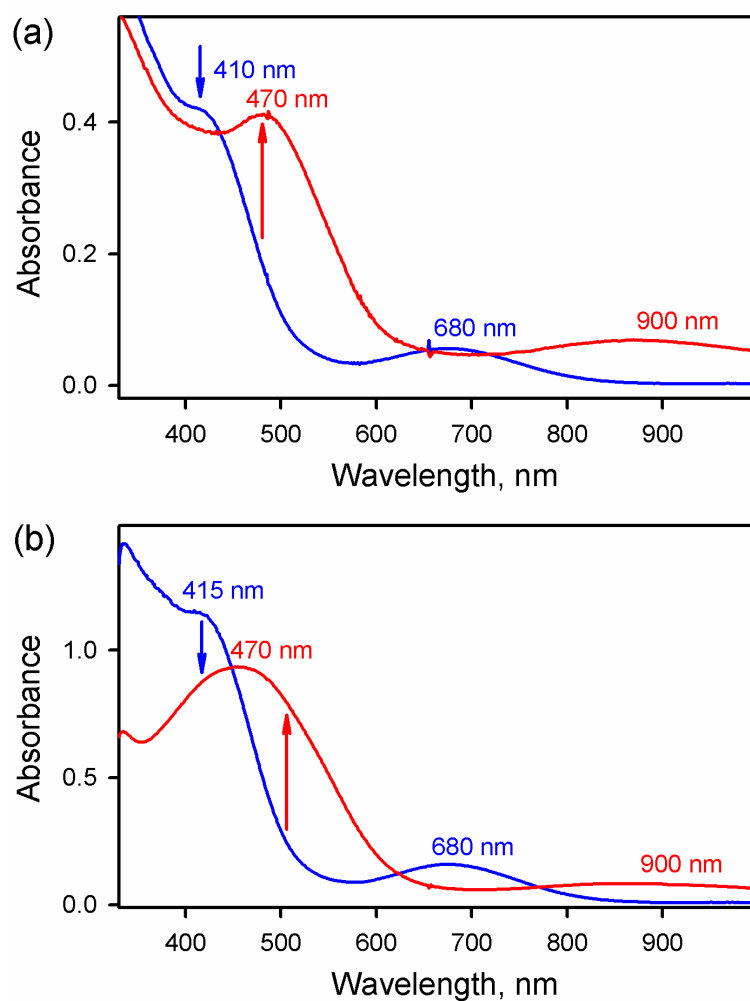

**Fig. S9** UV-vis spectral changes for the formation of **3** (red line) from (a) **2b** (0.25 mM; blue line) and (b) **2c** (0.25 mM; blue line) upon addition of Sc(OTf)<sub>3</sub> (1.25 mM; 5.0 equiv.) to an acetone solution of **2b** and **2c** at  $-40^{\circ}\text{C}$ .

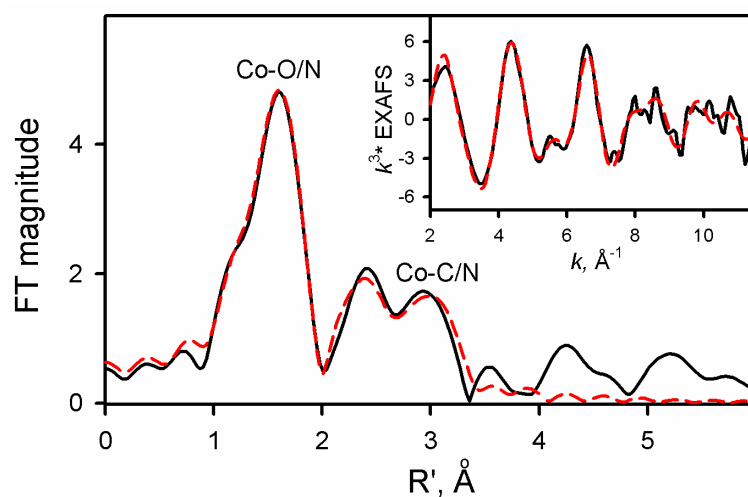

**Fig. S10** Observed (black solid line) and simulated (red dashed line) Fourier-transformed EXAFS spectra of **3**. The inset shows the observed (black solid line) and simulated (red dashed line) EXAFS data on a wave-vector scale before calculation of the Fourier transform.

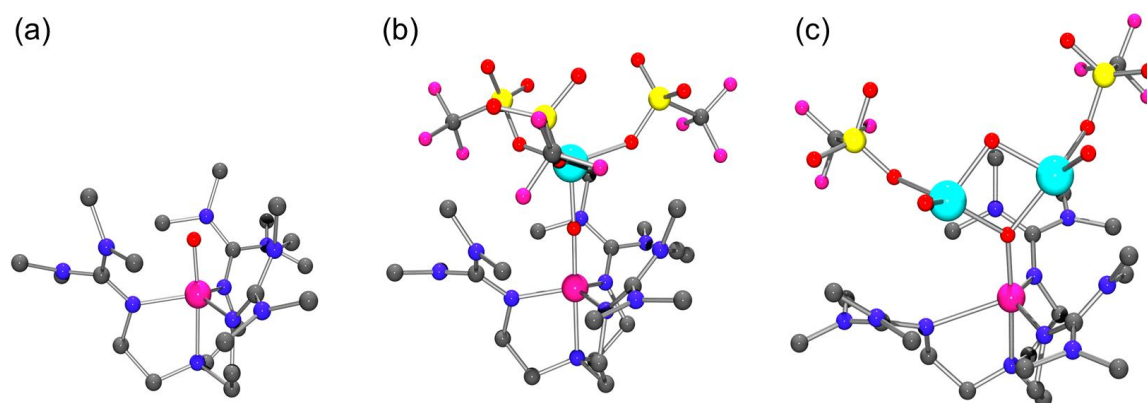

**Fig. S11** DFT-optimized structures of (a)  $[(\text{TMG}_3\text{tren})\text{Co}^{\text{IV}}(\text{O})]^{2+}$ , (b)  $[(\text{TMG}_3\text{tren})\text{Co}^{\text{IV}}(\text{O})-(\text{Sc}(\text{OTf})_3)]^{2+}$ , and (c)  $[(\text{TMG}_3\text{tren})\text{Co}^{\text{IV}}(\text{O})(\text{Sc}(\text{OTf})(\text{OH})_2)_2]^{2+}$ .

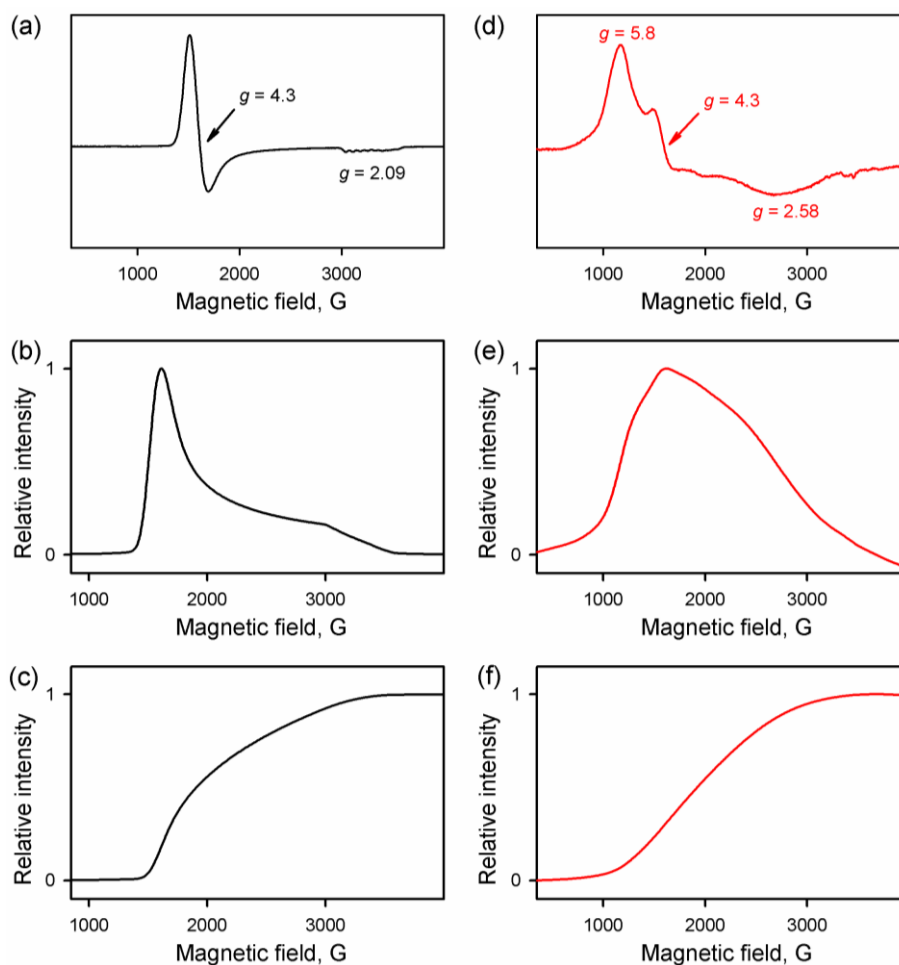

**Fig. S12** First derivative (a, d), integrated (b, e) and doubly integrated (c, f) EPR spectra of (a, b, c) **1** and (d, e, f) **3** recorded in acetone at 5 K. **3** was generated by reacting **1** (1.0 mM) with THF (0.10 M) in the presence of  $\text{Sc}(\text{OTf})_3$  (2.0 mM) in  $\text{O}_2$ -saturated acetone at 0 °C. The yield of the intermediate **3** was estimated to be 94%, which was calculated from the amount of **1** remained in the solution.

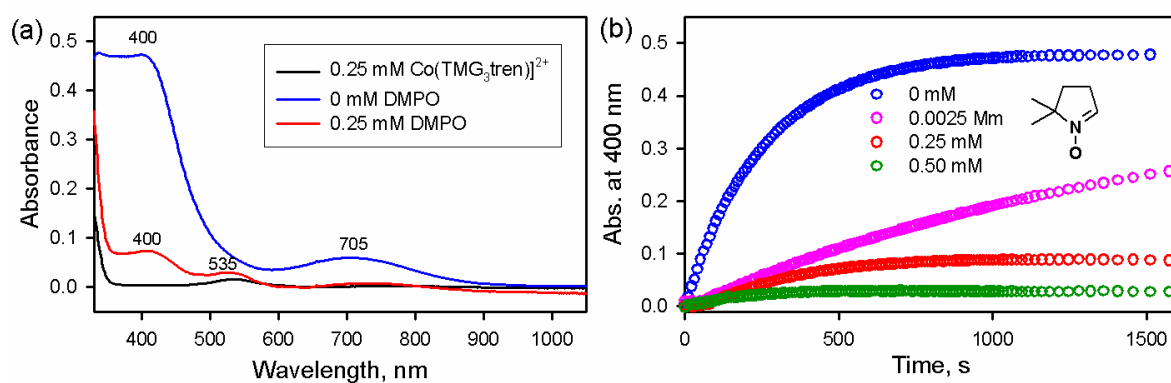

**Fig. S13** UV-vis spectral changes observed upon addition of THF (0.20 M) to **1** (0.25 mM; black line) in the absence (blue line) and presence of DMPO (0.25 mM; red line) in  $\text{O}_2$  saturated acetone at 25 °C. (b) Time profiles monitored for the change of absorbance at 400 nm due to **2a** for the  $\text{O}_2$ -activation by **1** (0.25 mM) with THF (0.20 M) in the absence and presence of DMPO (0 – 0.50 mM) in  $\text{O}_2$  saturated acetone at 25 °C.

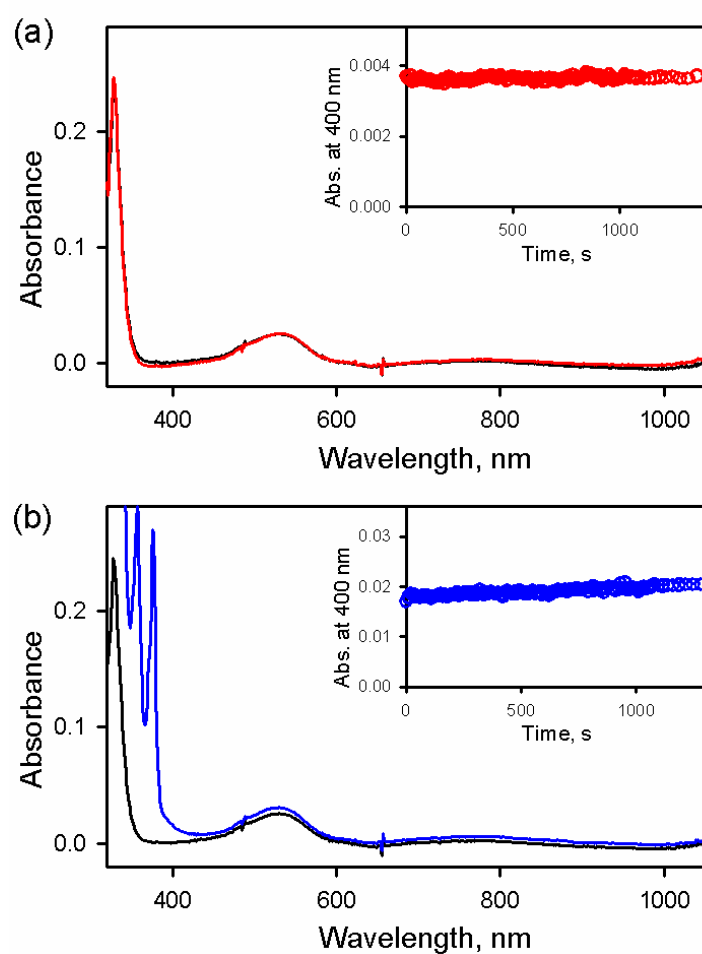

**Fig. S14** UV-vis spectral changes upon addition of (a) 0.2 M 2,4 di-tert-butyl phenol (b) 0.2 M DHA to an acetone solution of **1** (0.25 mM; black line) at 25 °C.

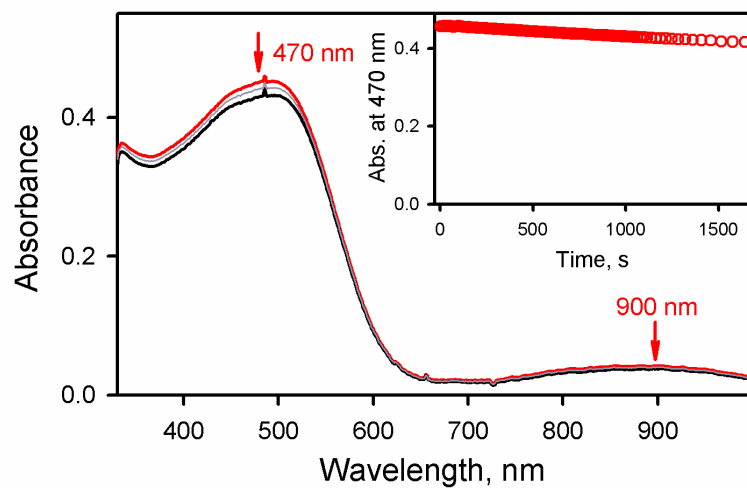

**Fig. S15** UV-vis spectral changes observed in the reaction of **3** (0.25 mM) and CCA (50 mM) in acetone at 25 °C. The rate is almost identical to that of natural decay of **3**.

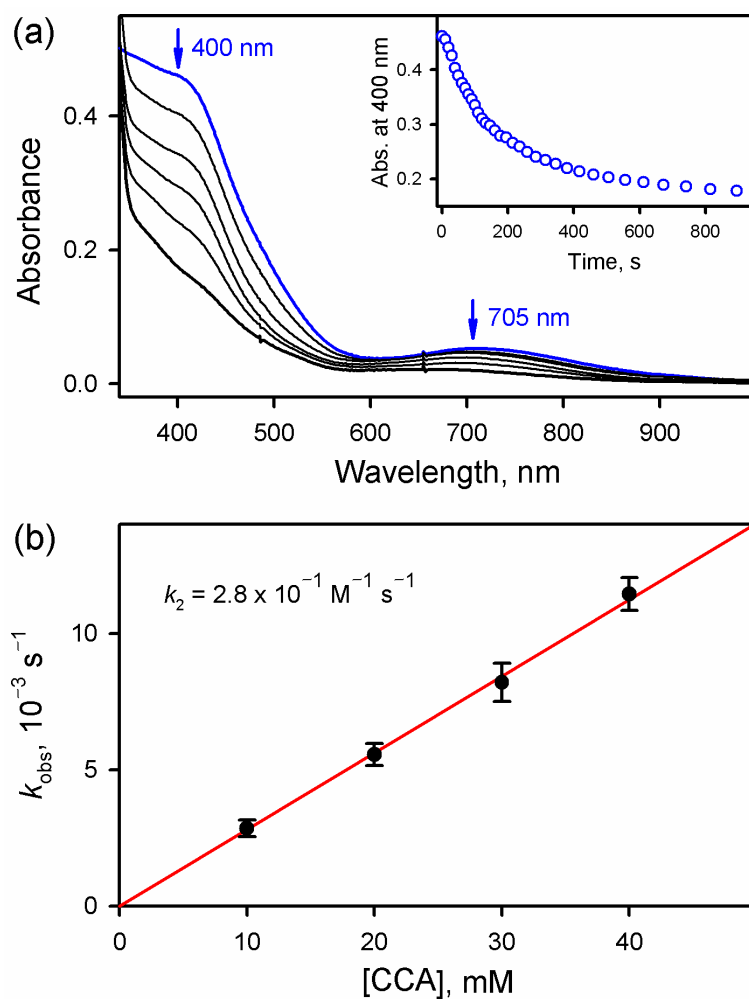

**Fig. S16** (a) UV-vis spectral changes observed in the reaction of **2a** (0.25 mM) and CCA (20 mM) in acetone at 25 °C. (b) Plot of pseudo-first-order rate constants ( $k_{\text{obs}}$ ) against the concentration of CCA obtained in the deformylation reaction of CCA by **2a** in acetone at 25 °C to determine the second-order rate constants ( $k_2$ ).

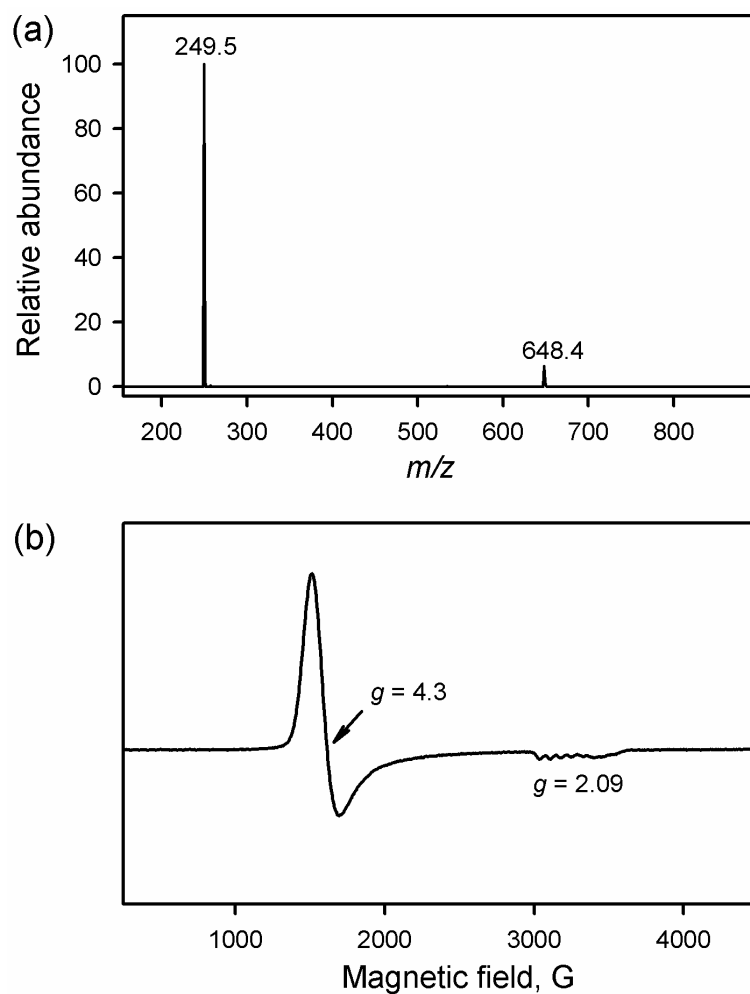

**Fig. S17** (a) ESI-MS spectrum of the complete reaction solution obtained in the oxidation of CCA (20 mM) by **2a** (0.25 mM) in acetone at 25 °C. The peaks at  $m/z = 249.5$  and 648.4 correspond to  $[\text{Co}^{\text{II}}(\text{TMG}_3\text{tren})]^{2+}$  (calculated  $m/z = 249.5$ ) and  $[\text{Co}^{\text{II}}(\text{TMG}_3\text{tren})(\text{OTf})]^+$  (calculated  $m/z = 648.3$ ), respectively. (b) X-band CW-EPR spectrum of the complete reaction solution obtained in the oxidation of CCA (20 mM) by **2a** (0.50 mM) in acetone at 25 °C. Spectrum was recorded in acetone at 5 K.

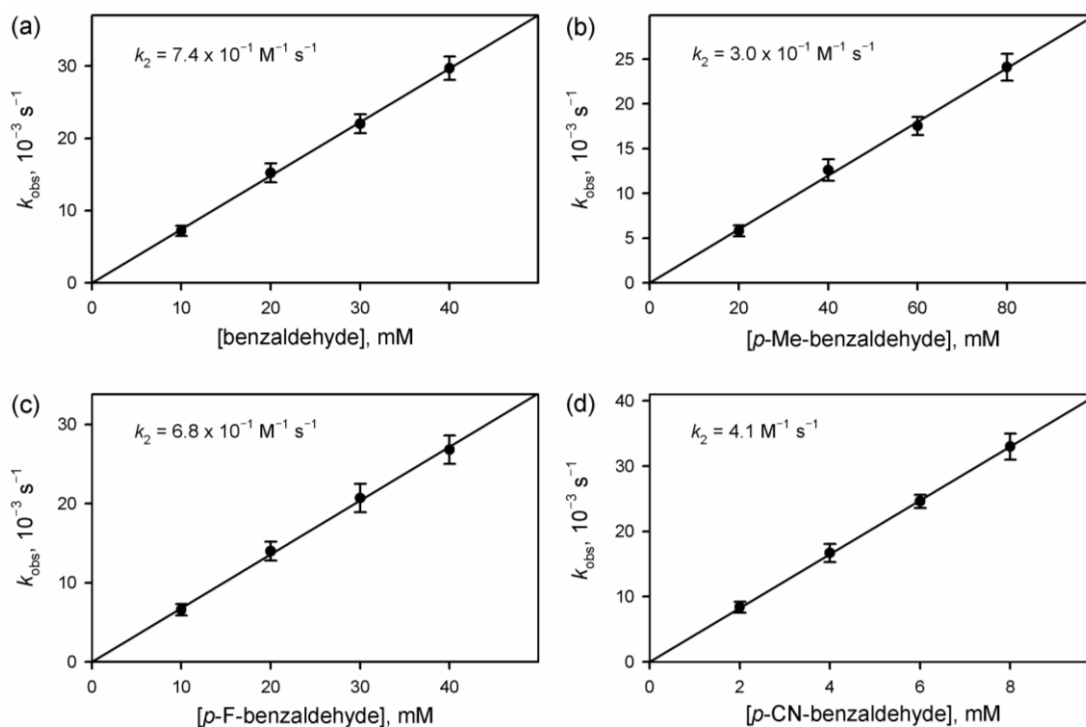

**Fig. S18** Plots of pseudo-first-order rate constants ( $k_{\text{obs}}$ ) against the concentration of *para*-X-benzaldehydes, (a) benzaldehyde, (b) *p*-methylbenzaldehyde, (c) *p*-fluorobenzaldehyde, and (d) *p*-cyanobenzaldehyde, obtained in the nucleophilic aldehyde deformylation reaction of *para*-X-benzaldehydes (X = Me, H, F, and CN) by **2a** in acetone at 25 °C to determine the second-order rate constants ( $k_2$ ).

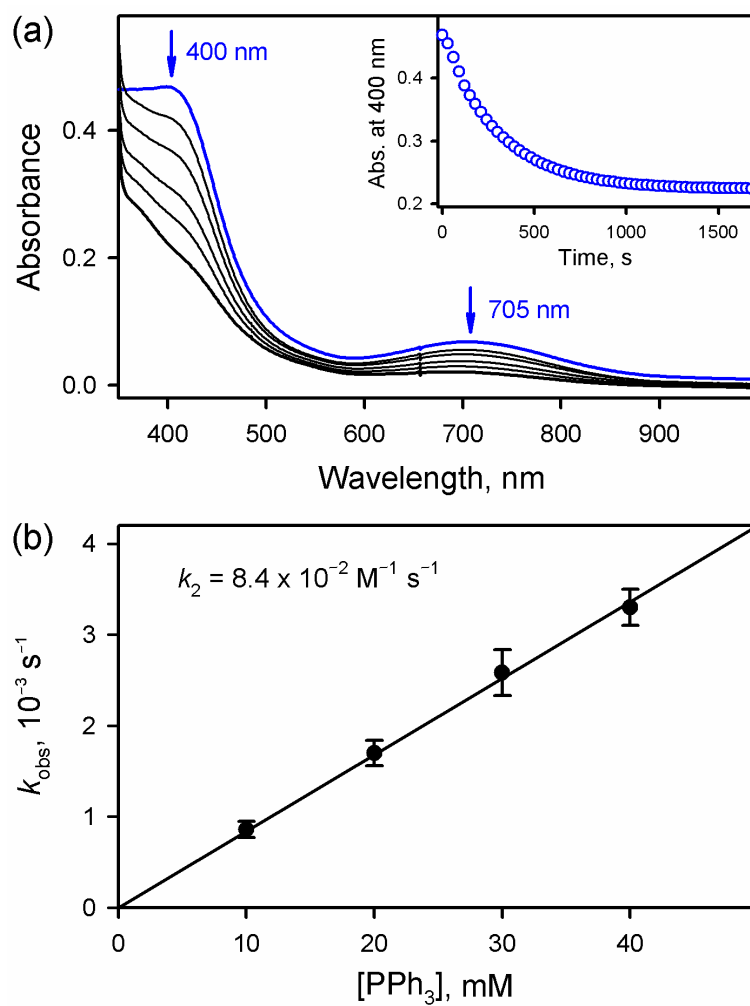

**Fig. S19** (a) UV-vis spectral changes observed in the reaction of **2a** (0.25 mM) and triphenylphosphine (40 mM) in acetone at 25 °C. (b) Plots of pseudo-first-order rate constants ( $k_{\text{obs}}$ ) against the concentration of triphenylphosphine to determine the second-order rate constant ( $k_2$ ) for the reaction of **2a** with triphenylphosphine in acetone at 25 °C.

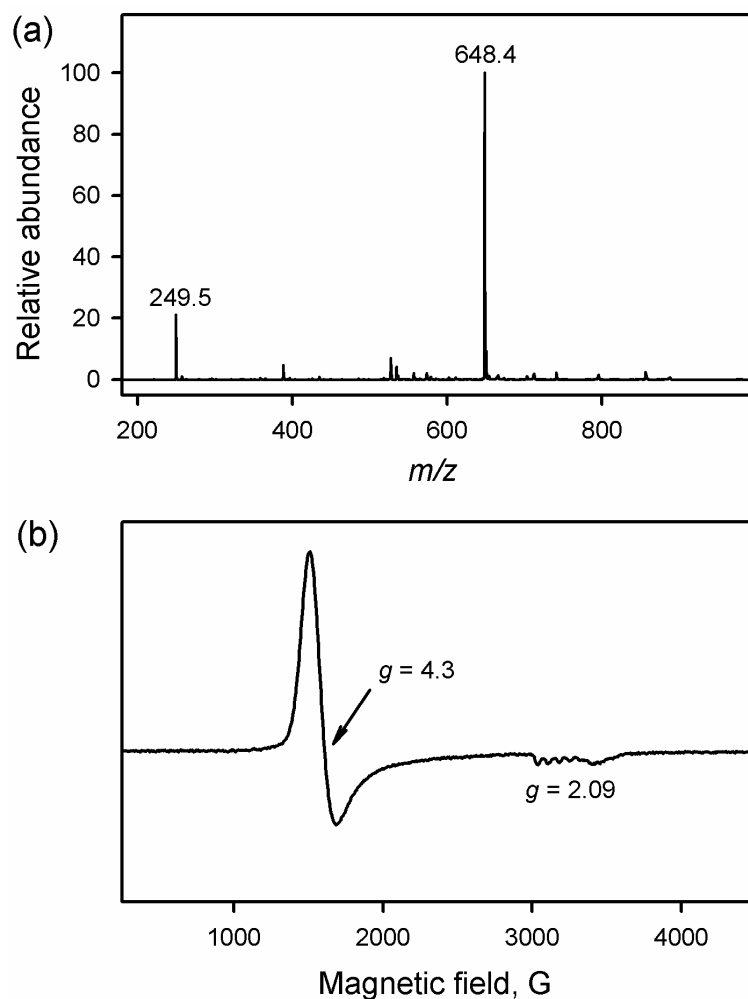

**Fig. S20** (a) ESI-MS spectrum of the complete reaction solution obtained in the oxidation of  $\text{PPh}_3$  (10 mM) by **2a** (0.25 mM) in acetone at 25 °C. The peaks at  $m/z = 249.5$  and 648.4 correspond to  $[\text{Co}^{\text{II}}(\text{TMG}_3\text{tren})]^{2+}$  (calculated  $m/z = 249.5$ ) and  $[\text{Co}^{\text{II}}(\text{TMG}_3\text{tren})(\text{OTf})]^+$  (calculated  $m/z = 648.3$ ), respectively. (b) X-band CW-EPR spectrum of the complete reaction solution obtained in the oxidation of  $\text{PPh}_3$  (20 mM) by **2a** (0.50 mM) in acetone at 25 °C. Spectrum was recorded in acetone at 5 K.

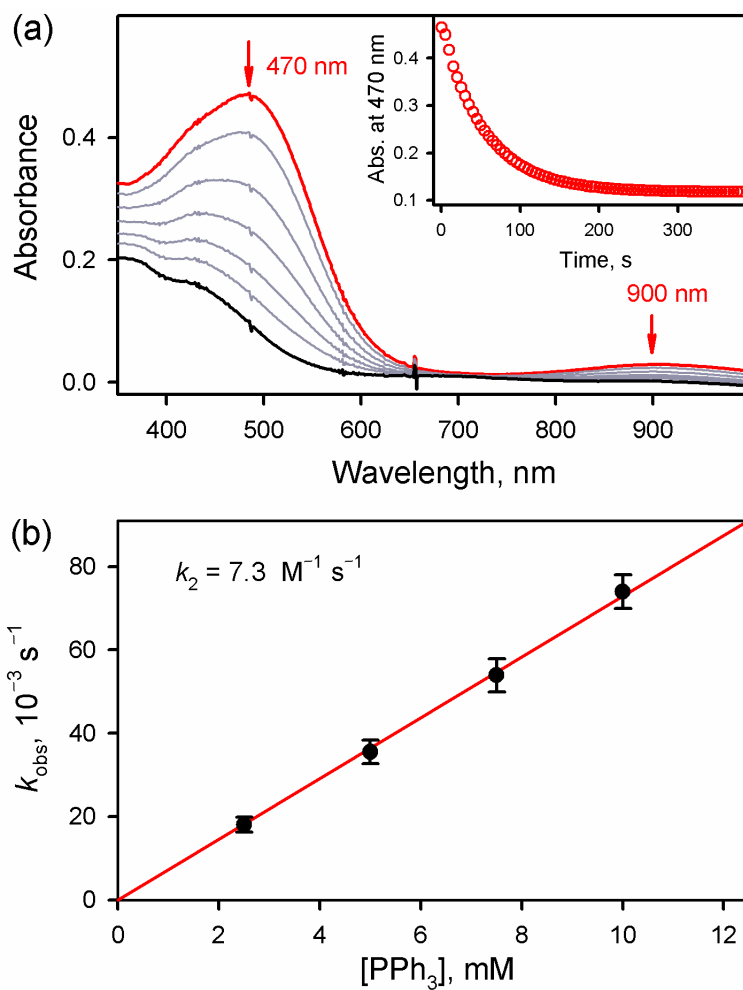

**Fig. S21** (a) UV-vis spectral changes observed in the reaction of **3** (0.25 mM) with  $\text{PPh}_3$  (2.5 mM) in acetone at 0 °C. (b) Plot of pseudo-first-order rate constants ( $k_{\text{obs}}$ ) against the concentration of  $\text{PPh}_3$  to determine the second-order rate constants ( $k_2$ ) in the oxidation of  $\text{PPh}_3$  by **3** in acetone at 0 °C.

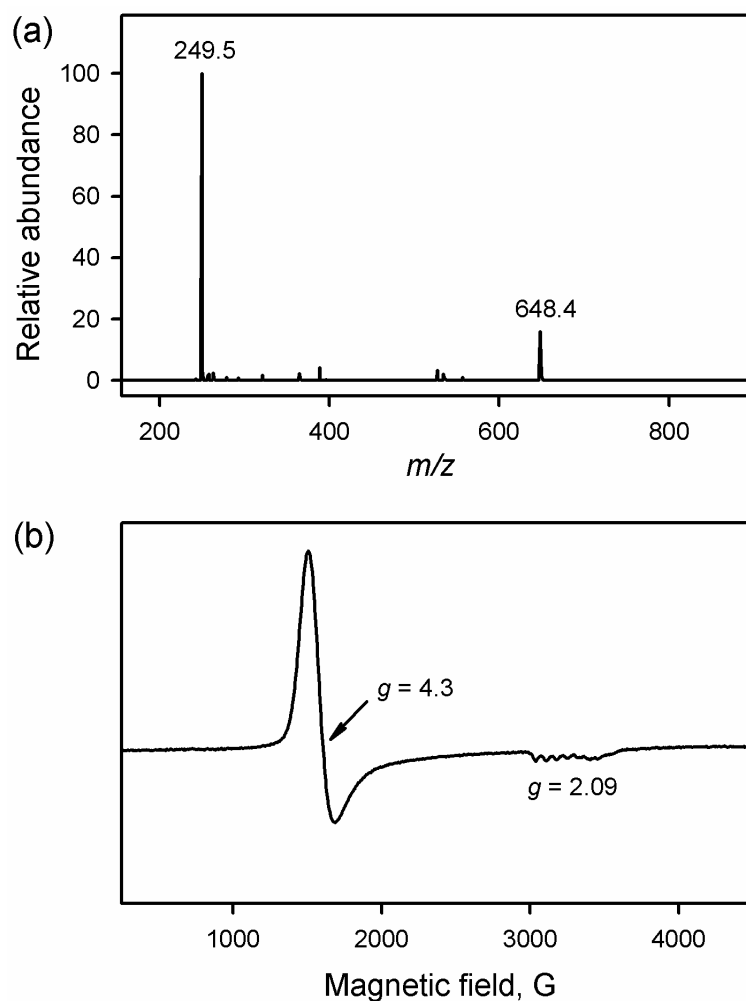

**Fig. S22** (a) ESI-MS spectrum of the complete reaction solution obtained in the oxidation of  $\text{PPh}_3$  (10 mM) by **3** (0.25 mM) in acetone at 0 °C. The peaks at  $m/z = 249.5$  and 648.4 correspond to  $[\text{Co}^{\text{II}}(\text{TMG}_3\text{tren})]^{2+}$  (calculated  $m/z = 249.5$ ) and  $[\text{Co}^{\text{II}}(\text{TMG}_3\text{tren})(\text{OTf})]^+$  (calculated  $m/z = 648.3$ ), respectively. (b) X-band CW-EPR spectrum of the complete reaction solution obtained in the oxidation of  $\text{PPh}_3$  (10 mM) by **3** (0.50 mM) in acetone at 0 °C. Spectrum was recorded in acetone at 5 K.

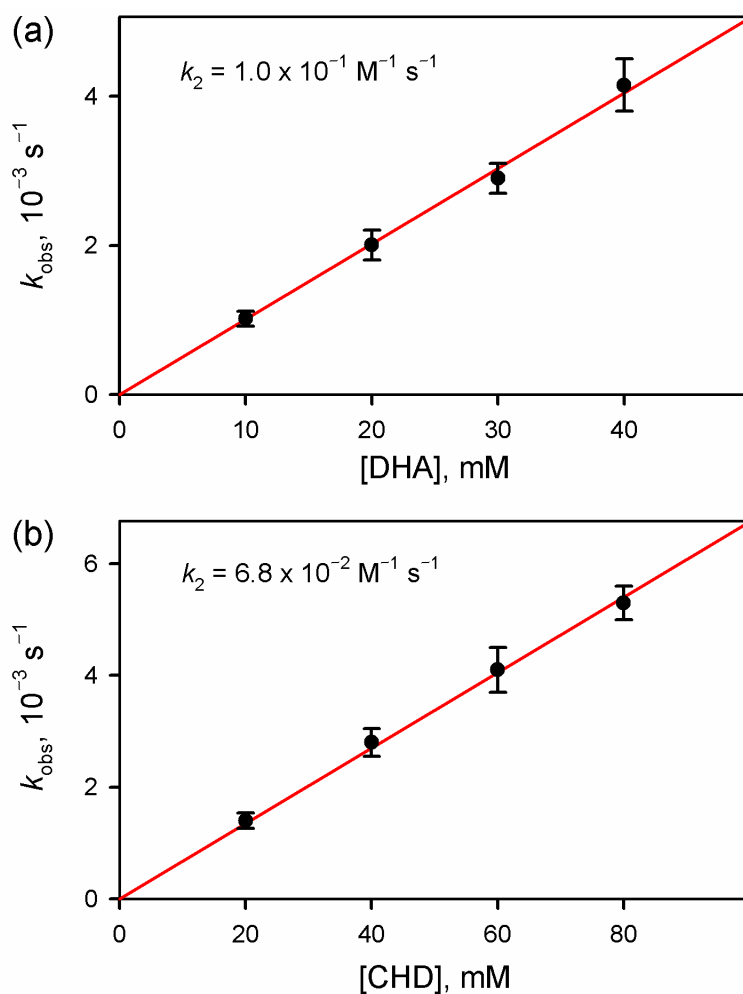

**Fig. S23** Plots of pseudo-first-order rate constants ( $k_{\text{obs}}$ ) against the concentration of substrates [(a) 9,10-dihydroanthracene (DHA) and (b) 1,4-cyclohexadiene (CHD)] to determine the second-order rate constants ( $k_2$ ) in the C–H bond activation reaction of DHA and CHD by **2a** in acetone at 25 °C.

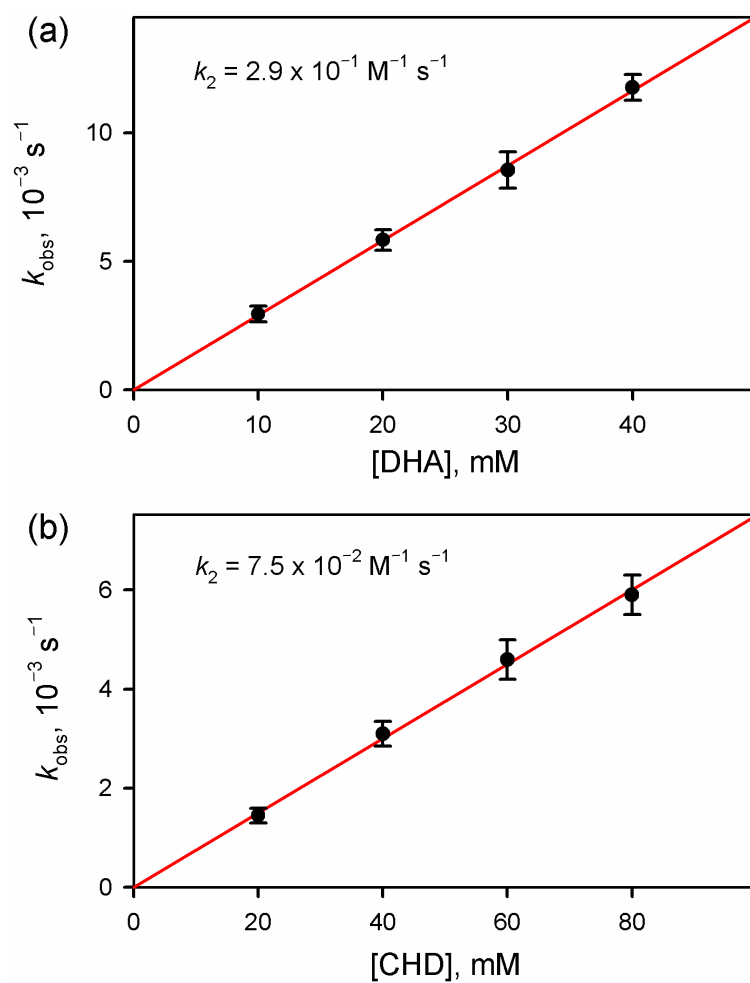

**Fig. S24** Plots of pseudo-first-order rate constants ( $k_{\text{obs}}$ ) against the concentration of substrates [(a) 9,10-dihydroanthracene (DHA) and (b) 1,4-cyclohexadiene (CHD)] to determine the second-order rate constants ( $k_2$ ) in the C–H bond activation reaction of DHA and CHD by **3** in acetone at 0 °C.

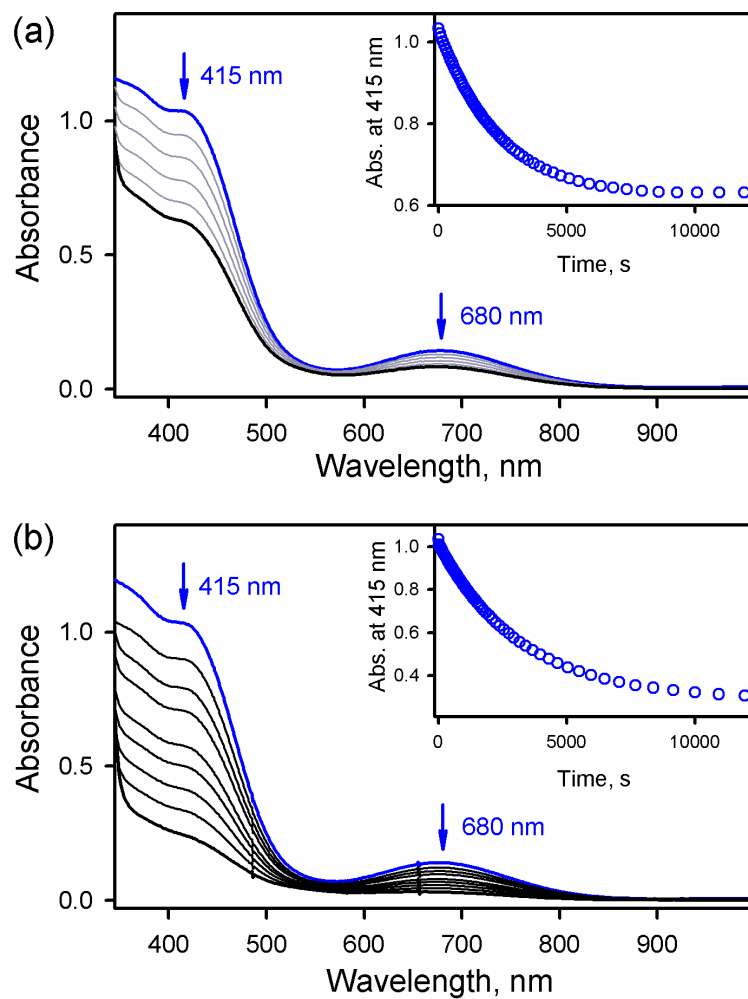

**Fig. S25** UV-vis spectral changes observed in the oxidation of (a) xanthene (50 mM) and (b) triphenylphosphine (50 mM) by **2c** (0.25 mM) in acetone at 25 °C. The Insets show time courses monitored at 415 nm due to **2c**.

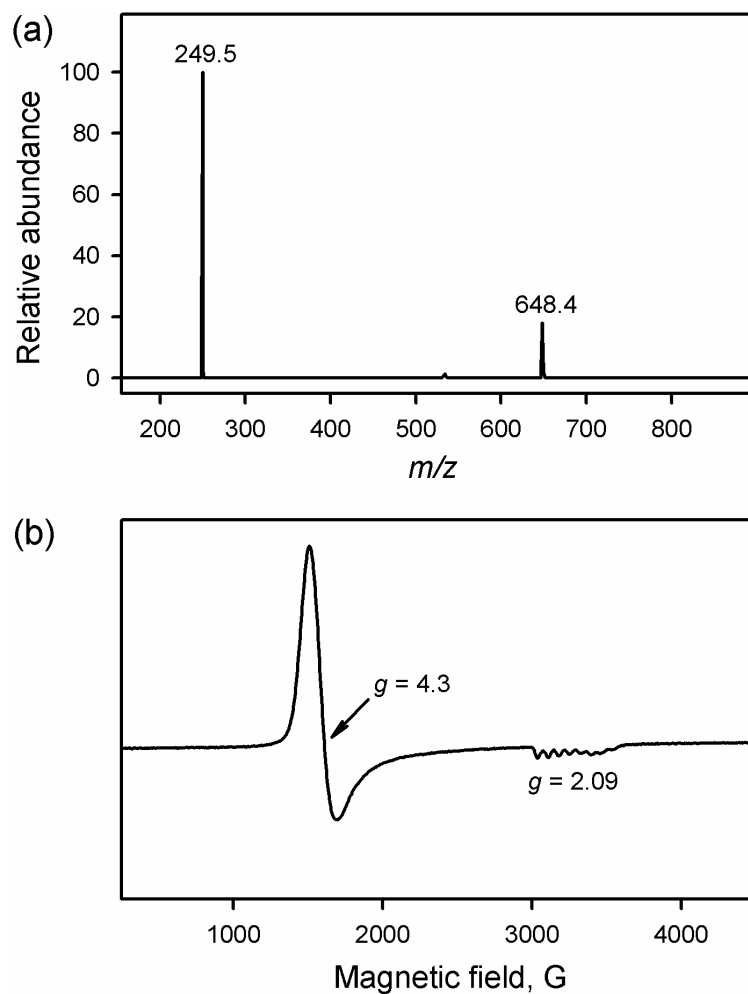

**Fig. 26** (a) ESI-MS spectrum of the complete reaction solution obtained in the oxidation of xanthene (20 mM) by **2a** (0.25 mM) in acetone at 25 °C. The peaks at  $m/z = 249.5$  and 648.4 correspond to  $[\text{Co}^{\text{II}}(\text{TMG}_3\text{tren})]^{2+}$  (calculated  $m/z = 249.5$ ) and  $[\text{Co}^{\text{II}}(\text{TMG}_3\text{tren})(\text{OTf})]^+$  (calculated  $m/z = 648.3$ ), respectively. (b) X-band CW-EPR spectrum of the complete reaction solution obtained in the oxidation of xanthene (20 mM) by **2a** (0.50 mM) in acetone at 25 °C. Spectrum was recorded in acetone at 5 K.

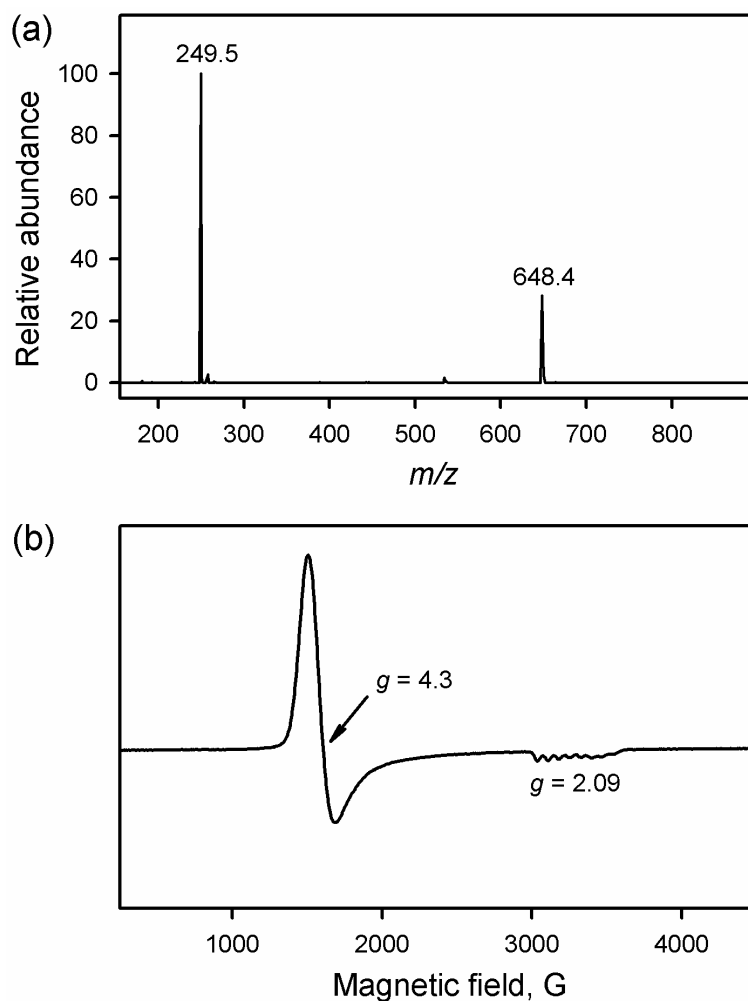

**Fig. S27** (a) ESI-MS spectrum of the complete reaction solution obtained in the oxidation of xanthene (20 mM) by **3** (0.25 mM) in acetone at 0 °C. The peaks at  $m/z = 249.5$  and 648.4 correspond to  $[\text{Co}^{\text{II}}(\text{TMG}_3\text{tren})]^{2+}$  (calculated  $m/z = 249.5$ ) and  $[\text{Co}^{\text{II}}(\text{TMG}_3\text{tren})(\text{OTf})]^+$  (calculated  $m/z = 648.3$ ), respectively. (b) X-band CW-EPR spectrum of the complete reaction solution obtained in the oxidation of xanthene (20 mM) by **3** (0.25 mM) in acetone at 0 °C. Spectrum was recorded in acetone at 5 K.
